# Supplementary material for: Pollution and Its Impact on Wild Animals: A Meta-Analysis on Oxidative Stress
Source: Springer Nature journal article supplement (doi:10.1007/s10393-010-0345-7), 2010-09-01
Supplement: MOESM1 [file 10393_2010_345_MOESM1_ESM.docx]

**Appendix S1**

**References in Meta-analysis**

1. Achuba F.I., 2008. African land snail *Achatina marginatus*, as bioindicator of environmental pollution North-West. J. Zool. 4, 1-5.
2. Alonso-Alvarez C, Munilla I, Lopez-Alonso M, Velando A. 2007. Sublethal toxicity of the *Prestige* oil spill on yellow-legged gulls. Environ Int 33:773-781.
3. Barjaktarovic L., Elliott J.E., Scheuhammer A.M. 2002.Metal and metallothionein concentrations in scoter (*Melanitta spp.*) from the Pacific Northwest of Canada, 1989–1994. Arch. Environ. Contam. Toxicol. 43, 486–491.
4. Bel’skii E.A., Stepanova Z. L. 1995. On industrial contamination effect on the state of nestlings of the hole-nesting birds. A tribute to Prof. V.V.Stanchinsky. The 2nd International Proceeding. Russia, Smolensk. Pp 96-99.
5. Berglund, Å.M.M., Sturve, J., Förlin, L., Nyholm, N.E.I. 2007. Oxidative stress in pied flycatcher *Ficedula hypoleuca* nestlings from metal contaminated environments in northern Sweden. Environ. Res. 105, 330-339.
6. Bonilla-Valverde D., Ruiz-Laguna J., Muñoz A., Ballesteros J., Lorenzo F., Gómez-Ariza J.L., López-Barea J. 2004. Evolution of biological effects of Aznalcóllar mining spill in the Algerian mouse (*Mus spretus*) using biochemical biomarkers. Toxicology 197, 123–138.
7. Bonina F.P., Puglia C. Frasca G., Cimino F., Trombetta D., Tringali G., Roccazzello A., Insiriello E., Rapisarda P., Saija A. 2008. Protective effects of a standardised red orange extract on air pollution-induced oxidative damage in traffic police officers. Natural Product Research 22, 1544-1551.
8. Buthbumrung N., Mahidol C., Navasumrit P., Promvijit J., Hunsonti P., Autrup H., Ruchirawat M. 2008. Oxidative DNA damage and influence of genetic polymorphisms among urban and rural schoolchildren exposed to benzene. Chemico-Biological Interac. 172, 185–194.
9. Cuesta N., Martínez A., Cuttitta F., Zudaire E. 2005. Identification of adrenomedullin in avian type II pneumocytes: Increased expression after exposure to air pollutants. J. Histochem. Cytochem. 53, 773–780.
10. Custer T.W., Custer C.M., Hines R.K., Sparks D.W., Melancon M.J., Hoffman D.J., Bickham, J.W. Wickliffe J. K. 2000. Mixed-function oxygenases, oxidative stress, and chromosomal damage measured in lesser scaup wintering on the Indiana harbor canal. Arch. Environ. Contam. Toxicol. 38, 522–529.
11. Eeva T., Tanhuanpää S., Råbergh C., Airaksinen S., Nikinmaa M., Lehikoinen E. 2000. Biomarkers and fluctuating asymmetry as indicators of pollution-induced stress in two hole-nesting passerines. Funct. Ecol. 14, 235- 243.
12. Falfushinska H., Loumbourdis N., Romanchuk L., Stolyar O. 2008. Validation of oxidative stress responses in two populations of frogs from Western Ukraine. Chemosphere 73, 1096–1101.
13. Geens A., Dauwe T., Eens M. 2009. Does anthropogenic metal pollution affect carotenoid colouration, antioxidative capacity and physiological condition of great tits (*Parus major*)? Comp. Biochem.Physiol. C 150, 155–163.
14. Hõrak P, Surai P.F., Ots I., Møller A.P. 2004. Fat soluble antioxidants in brood-rearing great tits *Parus major*: relations to health and appearance. J. Avian Biol. 35, 63–70.
15. Isaksson, C., Örnborg, J., Stephensen, E., Andersson, S. 2005. Plasma glutathione and carotenoid coloration as potential biomarkers of environmental stress in great tits. Ecohealth 2, 138-146.
16. Isaksson, C., McLaughlin, P., Monaghan, P., Andersson S. 2007a. Carotenoid pigmentation does not reflect total non-enzymatic antioxidant activity in plasma of adult and nestling great tits Parus major. Funct. Ecol. 21, 1123-1129.
17. Isaksson, C., Sturve J., Almroth B.C., Andersson S. 2009. The impact of urban environment on oxidative damage (TBARS) and antioxidant systems in lungs and liver of great tits, *Parus major*. Environ. Res. 109, 46-50.
18. Ji X., Hu W., Cheng J., Yuan T., Xu T., Qu L., Wang W. 2006. Oxidative stress on domestic ducks (Shaoxing duck) chronically exposed in a mercury–selenium coexisting mining area in China. Ecotox. Environ. Safe. 64, 171-177.
19. Kaminski P., Kurhalyuk N., Jerzak L., Kasprzak M., Tkachenko H., Klawe J.J., Szady-Grad M., Koim B., Wisniewska E. 2009. Ecophysiological determinations of antioxidant enzymes and lipoperoxidation in the blood of White Stork *Ciconia ciconia* from Poland. Environ. Res. 109, 29–39.
20. Kaminski P., Kurhalyuk N., Kasprzak M., Jerzak L., Tkachenko H., Szady-Grad M., Klawe J.J., Koim B. 2009. The impact of element–element interactions on antioxidant enzymatic activity in the blood of white stork (*Ciconia ciconia*) chicks. Arch. Environ. Contam. Toxicol. 56, 325–337.
21. Marques C.C., Gabriel S.I., Pinheiro T., Viegas-Crespo A.M., da Luz Mathias M., Bebianno M.J. 2008. Metallothionein levels in Algerian mice (*Mus spretus*) exposed to elemental pollution: An ecophysiological approach. Chemosphere 71, 1340–1347.
22. Migula P., Laszczyca P., Augustyniak M., Wilczek G., Rozpedek K., Kafel A., Woloszyn M. 2004. Antioxidative defence enzymes in beetles from a metal pollution gradient. Biologia 59, 651-660.
23. Rattner B.A., Hoffman D.J., Melancon M.J., Olsen G.H., Schmidt S.R., Parsons K.C. 2000. Organochlorine and metal contaminant exposure and effects in hatching black-crowned night herons (*Nycticorax nycticorax*) in Delaware Bay. Arch. Environ. Contam. Toxicol. 39, 38–45.
24. Reglero, M.M., Taggart M.A., Monsalve-González L., Mateo R. 2009. Heavy metal exposure in large game from a lead mining area: Effects on oxidative stress and fatty acid composition in liver. Environ. Poll. 157, 1388–1395.
25. Regoli F., Gorbi S., Fattorini D., Tedesco S., Notti A., Machella N., Bocchetti R., Benedetti M., Piva F. 2006. Use of the land snail *Helix aspersa* as sentinel organism for monitoring ecotoxicologic effects of urban pollution: An integrated approach. Environ. Health Persp. 114, 63-69.
26. Rossner Jr.P., Svecova V., Milcova A., Lnenickova Z., Solansky I., Sram R.J. 2008. Seasonal variability of oxidative stress markers in city bus drivers Part I. Oxidative damage to DNA. Mutat. Res. 642, 14–20.
27. Rossner Jr.P., Svecova V., Milcova A., Lnenickova Z., Solansky I., Sram R.J. 2008. Seasonal variability of oxidative stress markers in city bus drivers Part II. Oxidative damage to lipids and proteins Mutat. Res. 642, 21–27.
28. Sánchez-Chardi A., Marques C.C. Gabriel S.I. Capela-Silva F., Cabrita A.S., López-Fuster M.J., Nadal J., Mathias M.L. 2008. Haematology, genotoxicity, enzymatic activity and histopathology as biomarkers of metal pollution in the shrew *Crocidura russula*. Environ. Poll. 156, 1332–1339.
29. Sillanpää S., Salminen J-P., Lehikoinen E., Toivonen E., Eeva T. 2008. Carotenoids in a food chain along a pollution gradient. Sci. Tot. Environ. 406, 247-255.
30. Swiergosz-Kowalewska R., Bednarska A., Kafel A. 2006. Glutathione levels and enzyme activity in the tissues of bank vole *Clethrionomys glareolus* chronically exposed to a mixture of metal contaminants. Chemosphere 65, 963–974.
31. Tondel M., Arynchyn A., Jönsson P., Persson B., Tagesson C. 2005. Urinary 8-hydroxydeoxyguanosine in Belarussian children relates to urban living rather than radiation dose after the Chernobyl accident: A pilot study. Arch. Environ. Contam. Toxicol. 48, 515–519.
32. Vanparys C., Dauwe T., van Campenhout K., Bervoets L., De Coen W., Blust R., Eens M. 2008. Metallothioneins (MTs) and δ-aminolevulinic acid dehydratase (ALAd) as biomarkers of metal pollution in great tits (*Parus major*) along a pollution gradient. Sci. Tot. Environ. 401, 184-193.
33. Viegas-Crespo A.M., Lopes P.A., Pinheiro M.T., Santos M.C., Rodrigues P.D., Nunes A.C., Marques C., Mathias M.L. 2003. Hepatic elemental contents and antioxidant enzyme activities in Algerian mice (*Mus spretus*) inhabiting a mine area in central Portugal. Sci. Tot. Environ. 311, 101–109.
